# Supplementary material for: Stability of gum arabic-gold nanoparticles in physiological simulated pHs and their selective effect on cell lines
Source: Royal Society of Chemistry journal article supplement (doi:10.1039/c5ra24858b), 2016-01-01
Supplement: c5ra24858b1.pdf [file c5ra24858b1.pdf]

## **Stability of gum arabic-gold nanoparticles in physiological simulated pHs and their selective effect on cell lines**

Heloise Ribeiro de Barros,<sup>a</sup> Mateus Borba Cardoso,<sup>b</sup> Carolina Camargo de Oliveira,<sup>c</sup> Célia Regina Cavichiolo Franco,<sup>c</sup> Daniel de Lima Belan,<sup>c</sup> Marcio Vidotti,<sup>a</sup> Izabel C. Riegel-Vidotti<sup>a\*</sup>

<sup>a</sup> Grupo de Pesquisa em Macromoléculas e Interfaces, Departamento de Química, Universidade Federal do Paraná - UFPR, CxP 19081, CEP 81531-980, Curitiba, PR, Brazil

<sup>b</sup> Brazilian Synchrotron Light Laboratory P.O. Box 6154, 13083-970, Campinas, Brazil Fax: (+55) 19 3512-1004

<sup>c</sup> Departamento de Biologia Celular, Universidade Federal do Paraná - UFPR, CxP 19081, CEP 81531-980, Curitiba, PR, Brazil

\* Corresponding author

**Riegel-Vidotti, IC (also Riegel, IC)**

Phone: +55 41 33613184

Fax: +55 41 33613186

E-mail address: [izabel.riegel@ufpr.br](mailto:izabel.riegel@ufpr.br)

## SUPPLEMENTARY INFORMATION

|                                                                                                                                                                                                                                                                            |    |
|----------------------------------------------------------------------------------------------------------------------------------------------------------------------------------------------------------------------------------------------------------------------------|----|
| <b>1.</b> Figure S1. SAXS pattern of 0.1 wt% gum arabic in the absence of gold nanoparticles.                                                                                                                                                                              | S3 |
| <b>2.</b> Figure S2. Size distribution profiles obtained from TEM images of AuNPs-GA dispersed in intestinal (pH=6.8, A and B) and gastric (pH= 1.2, C and D) simulated fluids at the beginning of the first day (A and C) and at the seventh day (B and D) in vitro test. | S4 |
| <b>3.</b> Figure S3. Representative TEM images of AuNPs-GA on the 1 <sup>ST</sup> (A and C) and 7 <sup>TH</sup> (B and D) days of exposure in intestinal (A and B) and gastric (C and D) simulated fluids.                                                                 | S5 |

## 1. Figure S1

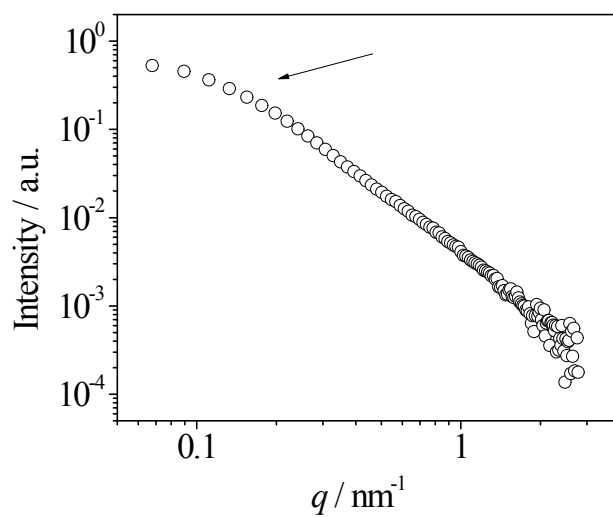

Figure S1. SAXS pattern of 0.1 wt% gum arabic in absence of gold nanoparticles.

## 2. Figure S2

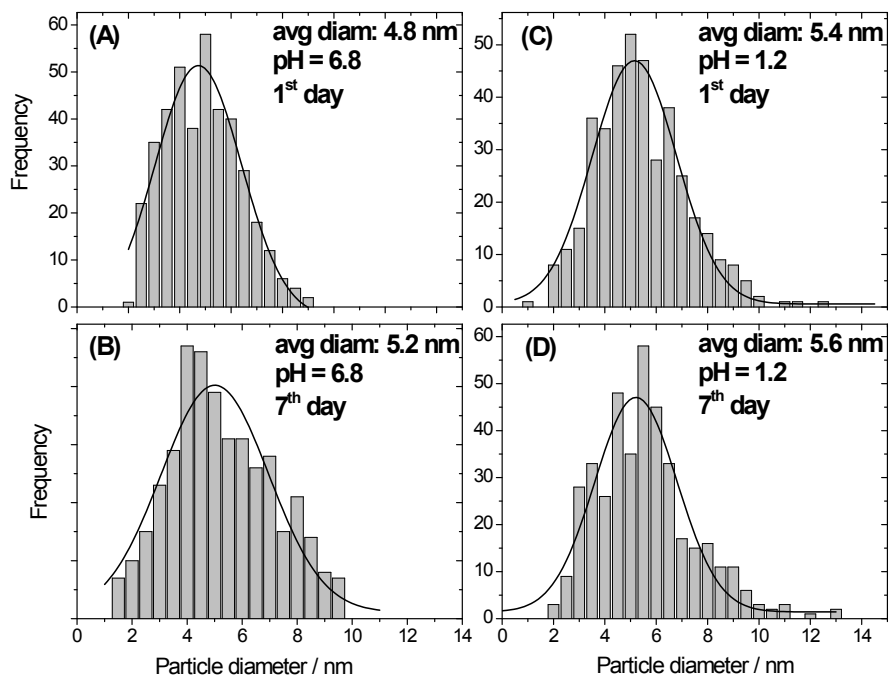

Figure S2. Size distribution profiles obtained from TEM images of AuNPs-GA dispersed in intestinal (pH=6.8, A and B) and gastric (pH= 1.2, C and D) simulated fluids at the beginning of the first day (A and C) and at the seventh day (B and D) in vitro test.

3. Figure S3

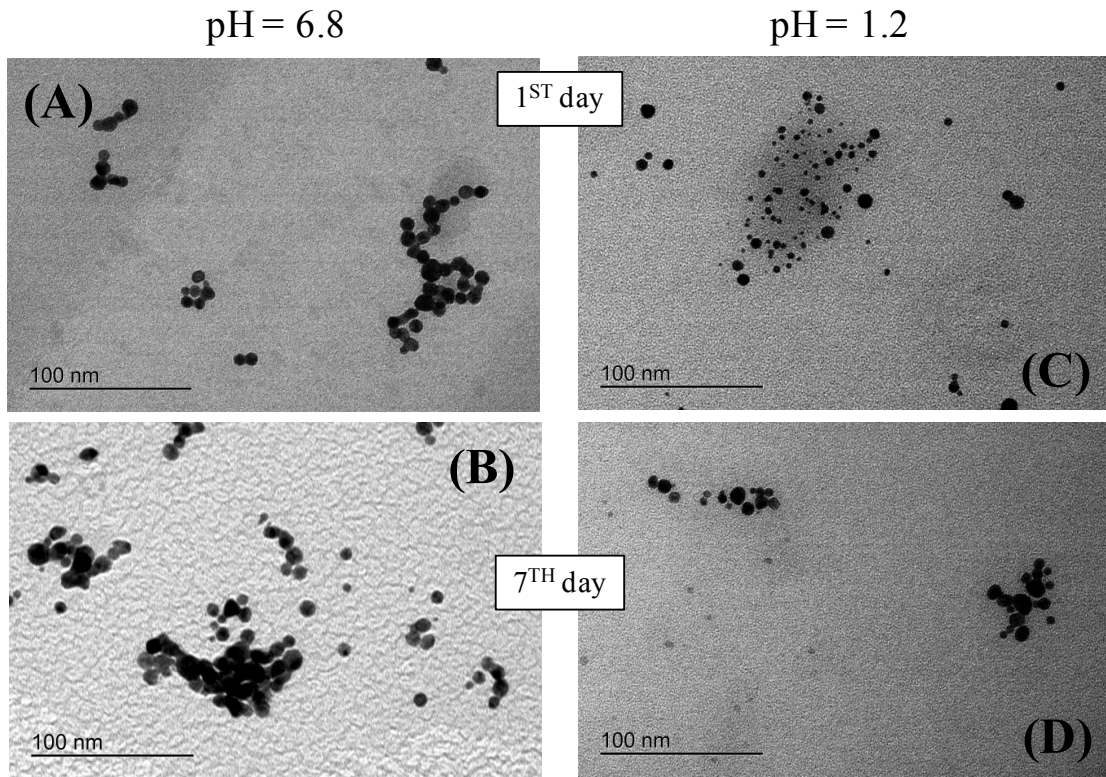

Figure S3. Representative TEM images of AuNPs-GA on the 1<sup>ST</sup> (A and C) and 7<sup>TH</sup> (B and D) days of exposure in intestinal (A and B) and gastric (C and D) simulated fluids.
